# Supplementary material for: A Model for Consumer Acceptance of Insect-Based Dog Foods among Adult UK Dog Owners
Source: MDPI journal article supplement (doi:10.3390/ani14071021), 2024-03-27
Supplement: s1 [file s1]

**Table S1- Mean and Standard Deviation for each Construct**

| Constructs                                     | Mean  | Standard Deviation |
|------------------------------------------------|-------|--------------------|
| Food Neophobia (FN)                            | 2.843 | 1.241              |
| Attitudes towards Uses of Animals (AUA)        | 3.780 | 1.239              |
| Food Preference- Animal Welfare (FPW)          | 4.104 | 0.942              |
| Food Preference- Environment (FPE)             | 3.726 | 0.981              |
| Food Preference- Health (FPH)                  | 4.213 | 0.881              |
| Disgust (AICD)                                 | 2.836 | 1.294              |
| Beliefs regarding Insect Sentience (AICS)      | 3.359 | 1.032              |
| Perceptions of Benefits (AICB)                 | 3.732 | 0.826              |
| Perceptions of Risks (AICR)                    | 2.661 | 0.755              |
| Perceived Behavioural Control (PBC)            | 4.118 | 0.967              |
| Perceived Barriers (PB)                        | 3.448 | 0.984              |
| Social Norms (SN)                              | 2.900 | 1.147              |
| Attitudes towards Insect-Based Dog Food (AIDF) | 3.436 | 0.806              |
| Intention to Try (ITT)                         | 3.537 | 1.133              |
| Intention to Buy (ITB)                         | 3.415 | 1.093              |

**Table S2- Survey**

| Question | Answer options |
|----------|----------------|
|----------|----------------|

Eligibility Questions- Please answer the following eligibility questions

|                                                                     |     |
|---------------------------------------------------------------------|-----|
| Are you aged 18 years or over?                                      | Yes |
|                                                                     | No  |
| Are you resident in the United Kingdom?                             | Yes |
|                                                                     | No  |
| Do you own or are you responsible for the care of one or more dogs? | Yes |
|                                                                     | No  |

Please select the option below which best represents your level of agreement with each of the following statements:

|                                                   |                            |
|---------------------------------------------------|----------------------------|
| I am constantly sampling new and different foods* | Strongly Disagree          |
|                                                   | Disagree                   |
|                                                   | Neither Agree nor Disagree |
|                                                   | Agree                      |
|                                                   | Strongly Agree             |
| I do not trust new foods                          | Strongly Disagree          |
|                                                   | Disagree                   |
|                                                   | Neither Agree nor Disagree |

## Supplementary Materials

|                                                      |                            |
|------------------------------------------------------|----------------------------|
| If I do not know what is in a food I will not eat it | Agree                      |
|                                                      | Strongly Agree             |
|                                                      | Strongly Disagree          |
|                                                      | Disagree                   |
|                                                      | Neither Agree nor Disagree |
| I am afraid to eat things I have never had before    | Agree                      |
|                                                      | Strongly Agree             |
|                                                      | Strongly Disagree          |
|                                                      | Disagree                   |
|                                                      | Neither Agree nor Disagree |
| I will eat almost anything*                          | Agree                      |
|                                                      | Strongly Agree             |
|                                                      | Strongly Disagree          |
|                                                      | Disagree                   |
|                                                      | Neither Agree nor Disagree |
|                                                      | Agree                      |
|                                                      | Strongly Agree             |

Please select the option below which best represents your level of agreement with each of the following statements:

|                                                                                                                         |                            |
|-------------------------------------------------------------------------------------------------------------------------|----------------------------|
| It is morally wrong to hunt wild animals for sport                                                                      | Strongly Disagree          |
|                                                                                                                         | Disagree                   |
|                                                                                                                         | Neither Agree nor Disagree |
|                                                                                                                         | Agree                      |
|                                                                                                                         | Strongly Agree             |
| I do not think that there is anything wrong with using animals in medical research*                                     | Strongly Disagree          |
|                                                                                                                         | Disagree                   |
|                                                                                                                         | Neither Agree nor Disagree |
|                                                                                                                         | Agree                      |
|                                                                                                                         | Strongly Agree             |
| I think it is perfectly acceptable for cattle and pigs to be raised for human consumption*                              | Strongly Disagree          |
|                                                                                                                         | Disagree                   |
|                                                                                                                         | Neither Agree nor Disagree |
|                                                                                                                         | Agree                      |
|                                                                                                                         | Strongly Agree             |
| The slaughter of whales and dolphins should be immediately stopped even if it means some people will be put out of work | Strongly Disagree          |
|                                                                                                                         | Disagree                   |
|                                                                                                                         | Neither Agree nor Disagree |
|                                                                                                                         | Agree                      |
|                                                                                                                         | Strongly Agree             |
| I sometimes get upset when I see wild animals in cages at zoos                                                          | Strongly Disagree          |
|                                                                                                                         | Disagree                   |
|                                                                                                                         | Neither Agree nor Disagree |
|                                                                                                                         | Agree                      |
|                                                                                                                         | Strongly Agree             |

Please select the option below which best represents your level of agreement with each of the following statements:

|                                                                                       |                            |
|---------------------------------------------------------------------------------------|----------------------------|
| It is important to me that the food I buy is not normally produced by hurting animals | Strongly Disagree          |
|                                                                                       | Disagree                   |
|                                                                                       | Neither Agree nor Disagree |

## Supplementary Materials

|                                                                                                  |                            |
|--------------------------------------------------------------------------------------------------|----------------------------|
| It is important to me that the food I buy has been produced in a way that respects animal rights | Agree                      |
|                                                                                                  | Strongly Agree             |
|                                                                                                  | Strongly Disagree          |
|                                                                                                  | Disagree                   |
|                                                                                                  | Neither Agree nor Disagree |
| I think that more regulation is needed on how to treat animals in agriculture                    | Agree                      |
|                                                                                                  | Strongly Agree             |
|                                                                                                  | Strongly Disagree          |
|                                                                                                  | Disagree                   |
|                                                                                                  | Neither Agree nor Disagree |
|                                                                                                  | Agree                      |
|                                                                                                  | Strongly Agree             |

Please select the option below which best represents your level of agreement with each of the following statements:

|                                                                                              |                            |
|----------------------------------------------------------------------------------------------|----------------------------|
| My food purchasing habits are affected by my concern for the environment                     | Strongly Disagree          |
|                                                                                              | Disagree                   |
|                                                                                              | Neither Agree nor Disagree |
|                                                                                              | Agree                      |
|                                                                                              | Strongly Agree             |
| I am worried about wasting the planet's resources                                            | Strongly Disagree          |
|                                                                                              | Disagree                   |
|                                                                                              | Neither Agree nor Disagree |
|                                                                                              | Agree                      |
|                                                                                              | Strongly Agree             |
| I consider the potential environmental impact of my actions when I make many of my decisions | Strongly Disagree          |
|                                                                                              | Disagree                   |
|                                                                                              | Neither Agree nor Disagree |
|                                                                                              | Agree                      |
|                                                                                              | Strongly Agree             |

Please select the option below which best represents your level of agreement with each of the following statements:

|                                                                                          |                            |
|------------------------------------------------------------------------------------------|----------------------------|
| The healthiness of my dog's food has little impact on my choice of food for them*        | Strongly Disagree          |
|                                                                                          | Disagree                   |
|                                                                                          | Neither Agree nor Disagree |
|                                                                                          | Agree                      |
|                                                                                          | Strongly Agree             |
| I am very particular about the healthiness of the food my dog eats                       | Strongly Disagree          |
|                                                                                          | Disagree                   |
|                                                                                          | Neither Agree nor Disagree |
|                                                                                          | Agree                      |
|                                                                                          | Strongly Agree             |
| I feed my dog what he/she likes and do not worry much about the healthiness of the food* | Strongly Disagree          |
|                                                                                          | Disagree                   |
|                                                                                          | Neither Agree nor Disagree |
|                                                                                          | Agree                      |
|                                                                                          | Strongly Agree             |
| It is important to me that the food my dog eats is nutritious                            | Strongly Disagree          |
|                                                                                          | Disagree                   |
|                                                                                          | Neither Agree nor Disagree |

## Supplementary Materials

Agree  
Strongly Agree

Please select the option below which best represents your level of agreement with each of the following statements:

|                                                   |                                                                                                     |
|---------------------------------------------------|-----------------------------------------------------------------------------------------------------|
| The idea of eating insects makes me feel nauseous | Strongly Disagree<br>Disagree<br>Neither Agree nor Disagree<br>Agree<br>Strongly Agree <sup>8</sup> |
| I am offended by the idea of eating insects       | Strongly Disagree<br>Disagree<br>Neither Agree nor Disagree<br>Agree<br>Strongly Agree              |
| Eating insects is disgusting                      | Strongly Disagree<br>Disagree<br>Neither Agree nor Disagree<br>Agree<br>Strongly Agree              |

Please select the option below which best represents your level of agreement with each of the following statements:

|                                                            |                                                                                        |
|------------------------------------------------------------|----------------------------------------------------------------------------------------|
| I think that insects are capable of feeling pain           | Strongly Disagree<br>Disagree<br>Neither Agree nor Disagree<br>Agree<br>Strongly Agree |
| I think that Insects are capable of experiencing suffering | Strongly Disagree<br>Disagree<br>Neither Agree nor Disagree<br>Agree<br>Strongly Agree |
| Insects have consciousness                                 | Strongly Disagree<br>Disagree<br>Neither Agree nor Disagree<br>Agree<br>Strongly Agree |
| Insects have rights                                        | Strongly Disagree<br>Disagree<br>Neither Agree nor Disagree<br>Agree<br>Strongly Agree |

Please select the option below which best represents your level of agreement with each of the following statements:

|                                                                                                          |                                                                                        |
|----------------------------------------------------------------------------------------------------------|----------------------------------------------------------------------------------------|
| Rearing insects for food generates less pollution and greenhouse gas than rearing conventional livestock | Strongly Disagree<br>Disagree<br>Neither Agree nor Disagree<br>Agree<br>Strongly Agree |
|----------------------------------------------------------------------------------------------------------|----------------------------------------------------------------------------------------|

## Supplementary Materials

|                                                                                                            |                                                                                        |
|------------------------------------------------------------------------------------------------------------|----------------------------------------------------------------------------------------|
| Rearing insects as food is more efficient and requires fewer resources than rearing conventional livestock | Strongly Disagree<br>Disagree<br>Neither Agree nor Disagree<br>Agree<br>Strongly Agree |
| Rearing insects for food requires much less space than rearing conventional livestock                      | Strongly Disagree<br>Disagree<br>Neither Agree nor Disagree<br>Agree<br>Strongly Agree |
| Insects contain high levels of high quality animal protein                                                 | Strongly Disagree<br>Disagree<br>Neither Agree nor Disagree<br>Agree<br>Strongly Agree |
| Insects are highly nutritious                                                                              | Strongly Disagree<br>Disagree<br>Neither Agree nor Disagree<br>Agree<br>Strongly Agree |

Please select the option below which best represents your level of agreement with each of the following statements:

|                                                                      |                                                                                        |
|----------------------------------------------------------------------|----------------------------------------------------------------------------------------|
| Insects contain harmful toxins                                       | Strongly Disagree<br>Disagree<br>Neither Agree nor Disagree<br>Agree<br>Strongly Agree |
| Eating insects would expose me to harmful chemicals and insecticides | Strongly Disagree<br>Disagree<br>Neither Agree nor Disagree<br>Agree<br>Strongly Agree |
| Eating insects will increase risk of infectious disease              | Strongly Disagree<br>Disagree<br>Neither Agree nor Disagree<br>Agree<br>Strongly Agree |

The remaining questions in this survey will refer to "insect-based dog food". Insect-based dog food is an innovative dog food with insects as the core ingredient. Seven species of insect are currently authorized for use in pet food in the EU and the UK of which the most commonly used are: house crickets, yellow mealworms and black soldier flies. Companies have already successfully launched insect-based dog food products in stores and online.

Please select the option below which best represents your level of agreement with each of the following statements:

|                                                                                                                         |                                                                      |
|-------------------------------------------------------------------------------------------------------------------------|----------------------------------------------------------------------|
| The decision to feed my dog products containing insect-based ingredients in the next month is under my complete control | Strongly Disagree<br>Disagree<br>Neither Agree nor Disagree<br>Agree |
|-------------------------------------------------------------------------------------------------------------------------|----------------------------------------------------------------------|

## Supplementary Materials

Feeding products containing insect based ingredients to my dog in the next month is completely up to me

Strongly Agree  
Strongly Disagree  
Disagree  
Neither Agree nor Disagree  
Agree  
Strongly Agree

Please select the option below which best represents your level of agreement with each of the following statements:

Insect-based dog foods are more expensive

Strongly Disagree  
Disagree  
Neither Agree nor Disagree  
Agree  
Strongly Agree

Insect-based dog foods are not available in my local shops

Strongly Disagree  
Disagree  
Neither Agree nor Disagree  
Agree  
Strongly Agree

I have little access to information about insect-based dog foods

Strongly Disagree  
Disagree  
Neither Agree nor Disagree  
Agree  
Strongly Agree

Please select the option below which best represents your level of agreement with each of the following statements:

I would be more likely to feed my dog insect-based dog foods if recommended by my family

Strongly Disagree  
Disagree  
Neither Agree nor Disagree  
Agree  
Strongly Agree

I would be more likely to feed my dog insect-based dog foods if recommended by my friends

Strongly Disagree  
Disagree  
Neither Agree nor Disagree  
Agree  
Strongly Agree

I would be more likely to feed my dog insect-based dog foods if recommended by my colleagues/peers

Strongly Disagree  
Disagree  
Neither Agree nor Disagree  
Agree  
Strongly Agree

Please select the option below which best represents your level of agreement with each of the following statements:

Insect-based dog food is healthy

Strongly Disagree  
Disagree  
Neither Agree nor Disagree  
Agree  
Strongly Agree

Insect-based dog food is safe for dogs to eat

Strongly Disagree

## Supplementary Materials

|                                                                                                                       |                                                                                                                                                                                                                                                       |
|-----------------------------------------------------------------------------------------------------------------------|-------------------------------------------------------------------------------------------------------------------------------------------------------------------------------------------------------------------------------------------------------|
|                                                                                                                       | Disagree<br>Neither Agree nor Disagree<br>Agree<br>Strongly Agree<br>Strongly Disagree<br>Disagree<br>Neither Agree nor Disagree<br>Agree<br>Strongly Agree<br>Strongly Disagree<br>Disagree<br>Neither Agree nor Disagree<br>Agree<br>Strongly Agree |
| Insect-based dog food is more sustainable than most ordinary dog foods                                                |                                                                                                                                                                                                                                                       |
| Insect-based dog food is better for animal welfare compared to most ordinary dog foods                                |                                                                                                                                                                                                                                                       |
| Please select the option below which best represents your level of agreement with each of the following statements:   |                                                                                                                                                                                                                                                       |
| I would be willing to try feeding insect based food to my dog if it were widely available in stores                   | Strongly Disagree<br>Disagree<br>Neither Agree nor Disagree<br>Agree<br>Strongly Agree                                                                                                                                                                |
| I would be willing to try feeding insect based food to my dog if it were recommended by vets                          | Strongly Disagree<br>Disagree<br>Neither Agree nor Disagree<br>Agree<br>Strongly Agree                                                                                                                                                                |
| I would be willing to try feeding insect based food to my dog if free samples were available                          | Strongly Disagree<br>Disagree<br>Neither Agree nor Disagree<br>Agree<br>Strongly Agree                                                                                                                                                                |
| Please select the option below which best represents your level of agreement with each of the following statements:   |                                                                                                                                                                                                                                                       |
| I would buy insect- based dog food if it were produced in a more environmentally- friendly way than ordinary dog food | Strongly Disagree<br>Disagree<br>Neither Agree nor Disagree<br>Agree<br>Strongly Agree                                                                                                                                                                |
| I would buy insect- based dog food if it had more micronutrients than ordinary dog food                               | Strongly Disagree<br>Disagree<br>Neither Agree nor Disagree<br>Agree<br>Strongly Agree                                                                                                                                                                |
| I would buy insect- based dog food if it were as accessible as ordinary dog food                                      | Strongly Disagree<br>Disagree<br>Neither Agree nor Disagree<br>Agree<br>Strongly Agree                                                                                                                                                                |

## Supplementary Materials

I would buy insect- based dog food if it had a similar look and texture as ordinary dog food

Strongly Disagree  
Disagree  
Neither Agree nor Disagree  
Agree

I would buy insect- based dog food if it were from a renowned brand

Strongly Agree  
Strongly Disagree  
Disagree  
Neither Agree nor Disagree

I would buy insect- based dog food if it were cheaper than ordinary dog food

Agree  
Strongly Agree  
Strongly Disagree  
Disagree

### Demographic Questions

Finally, please answer the following demographic questions

What is your gender?

Neither Agree nor Disagree  
Agree  
Strongly Agree

What is your age?

Male  
Female  
Other  
Prefer not to say

How would you describe your dietary preference?

18-30  
31-45  
46-64  
65 and over  
Omnivore (I eat most animal products including meat, fish, seafood and/or dairy)  
Semi-vegetarian/ Flexitarian (I am cutting back on meat but not avoiding it completely)  
Full-time Vegetarian (I do not eat meat but am still eating other animal products)  
Vegan (I do not eat any animal products)

Statements marked \* were reverse scored
